# Supplementary material for: SnO as a potential oxide thermoelectric candidate
Source: Royal Society of Chemistry journal article supplement (doi:10.1039/c7tc01623a), 2017-01-01
Supplement: c7tc01623a1.pdf [file c7tc01623a1.pdf]

## Electronic Supplemental Information (ESI):

### SnO as a Potential Oxide Thermoelectric Candidate

Samuel A. Miller,<sup>†</sup> Prashun Gorai,<sup>‡</sup> Umut Aydemir,<sup>†</sup> Thomas O. Mason,<sup>†</sup> Vladan  
Stevanović,<sup>‡</sup> Eric S. Toberer,<sup>‡</sup> and G. Jeffrey Snyder<sup>\*,†</sup>

<sup>†</sup>*Northwestern University, Evanston, IL 60208, USA*

<sup>‡</sup>*National Renewable Energy Laboratory, Golden, CO 80401, USA*

<sup>¶</sup>*Colorado School of Mines, Golden, CO 80401 USA*

E-mail: jeff.snyder@northwestern.edu

The synthesized SnO was determined to be phase-pure after the precipitation reaction procedure using X-ray diffraction (Fig. S1). SnO was stable in air, vacuum, and inert atmosphere (argon) up to  $\sim 300^\circ\text{C}$  for one week. However, increasing the annealing temperature to  $325^\circ\text{C}$  caused the decomposition of SnO to begin, as SnO<sub>2</sub> impurities were observed after 12 hours. Figure S2 shows the diffraction pattern of unannealed SnO as well as SnO sealed in fused silica tubes evacuated to  $10^{-5}$  mbar and annealed. Additionally, it was found that ball milling for more than a few minutes produced increasing amounts of SnO<sub>2</sub> impurity, as did attempts to dope SnO with Sb (Fig. S3). SnO showed no impurities after pressing pellets, and annealing them at  $275^\circ\text{C}$  for up to one week did not lead to any further densification. The optical band gap was determined to be 0.68 eV using diffuse reflectance measurements and the Kubelka-Munk method (Fig. S4) and is in good agreement with previous reports.

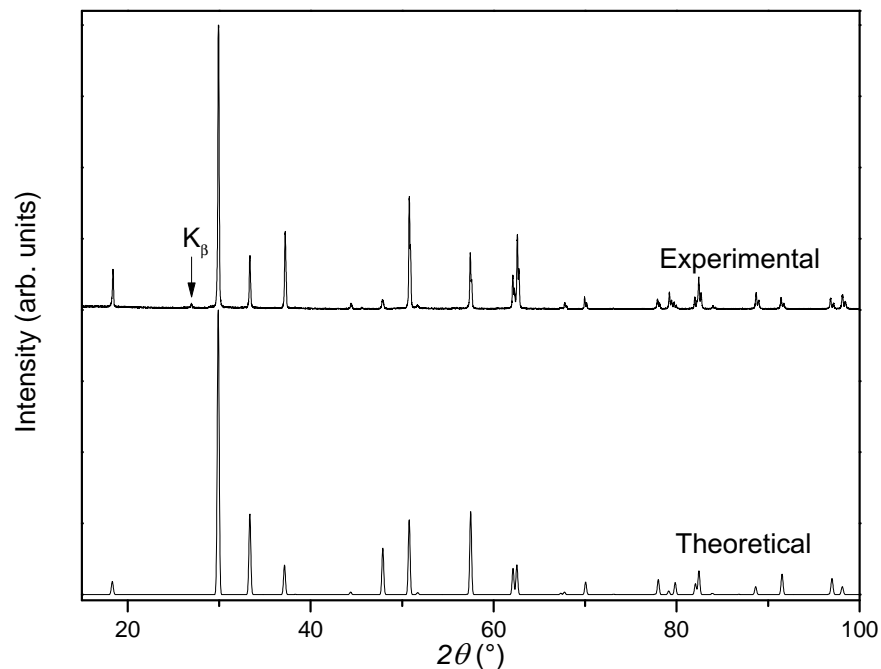

Figure S1: The theoretical pattern for SnO (space group 129) as well as the diffraction pattern for phase-pure SnO synthesized using the precipitation reaction synthesis.

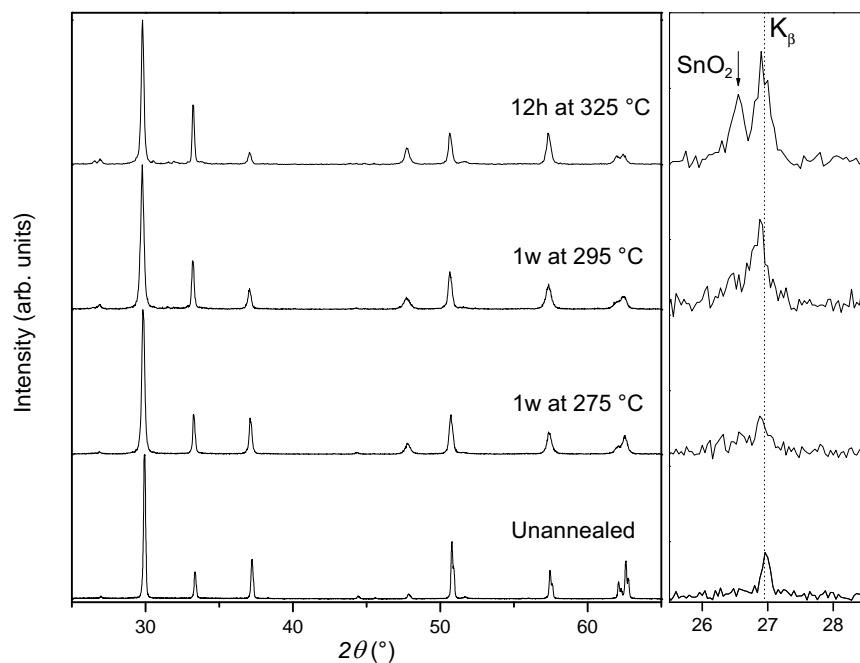

Figure S2: The diffraction pattern for the unannealed SnO as well as SnO sealed, evacuated, and then annealed at various times and temperatures. The  $K_\beta$  peak for the main SnO peak is labeled and apparent in all diffraction patterns and the main SnO<sub>2</sub> peak is indicated with an asterisk for the anneal at 325 °C

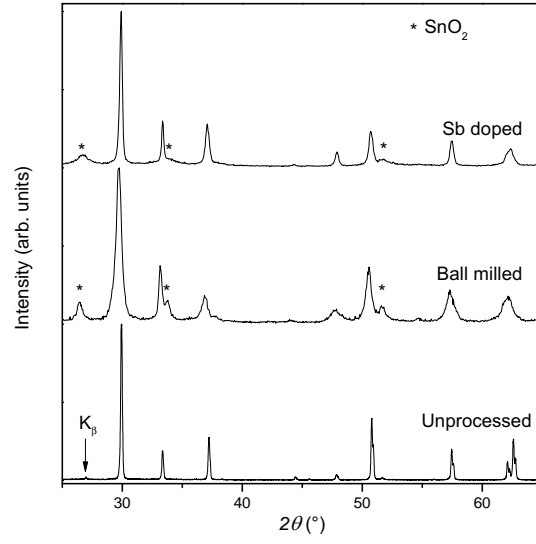

Figure S3: The diffraction pattern for the as-synthesized SnO, SnO ball milled for 10 minutes in an argon atmosphere, and SnO doped with Sb during the precipitation reaction. Both the ball milled and Sb doped samples show  $\text{SnO}_2$  impurity with the main peaks indicated with an asterisk.

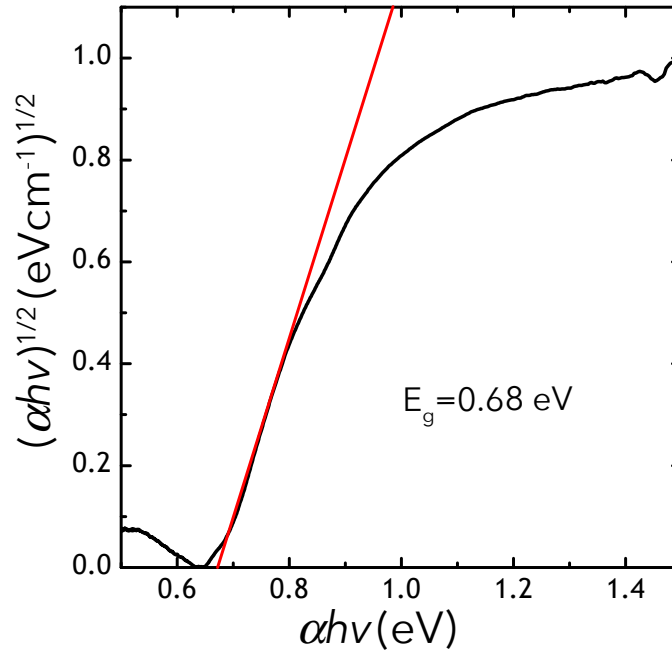

Figure S4: The normalized absorption vs. energy spectra for bulk SnO powder calculated using the Kubelka-Munk method. The indirect gap estimated from diffuse reflectance measurements is approximately 0.68 eV.
